# Supplementary material for: Glycemic efficacy and safety of the SGLT2 inhibitor ertugliflozin in patients with type 2 diabetes and stage 3 chronic kidney disease: an analysis from the VERTIS CV randomized trial
Source: HighWire-hosted journal article supplement (doi:10.1136/bmjdrc-2021-002484), 2021-10-01
Supplement: bmjdrc-2021-002484supp001_data_supplement.pdf [file bmjdrc-2021-002484supp001_data_supplement.pdf]

VERTIS CV Ertu Glycemic Efficacy and Safety in CKD3

Final Draft

**SUPPLEMENTARY APPENDIX****Glycemic Efficacy and Safety of the SGLT2 Inhibitor Ertugliflozin in Patients with Type 2 Diabetes and Stage 3 Chronic Kidney Disease: An Analysis from the VERTIS CV Randomized Trial**

Samuel Dagogo-Jack<sup>1</sup>, Richard E. Pratley<sup>2</sup>, David Z.I. Cherney<sup>3</sup>, Darren K. McGuire<sup>4</sup>, Francesco Cosentino<sup>5</sup>, Weichung J. Shih<sup>6</sup>, Jie Liu<sup>7</sup>, Robert Frederich<sup>8</sup>, James P. Mancuso<sup>9</sup>, Annaswamy Raji<sup>7</sup>, Ira Gantz<sup>7</sup>

<sup>1</sup>University of Tennessee Health Science Center, Memphis, TN, USA; <sup>2</sup>AdventHealth Translational Research Institute, Orlando, FL, USA; <sup>3</sup>University of Toronto, Toronto, Canada; <sup>4</sup>University of Texas Southwestern Medical Center and Parkland Health and Hospital System, Dallas, TX, USA; <sup>5</sup>Karolinska Institute and Karolinska University Hospital, Stockholm, Sweden; <sup>6</sup>Rutgers School of Public Health and Rutgers Cancer Institute of New Jersey, Piscataway, NJ, USA; <sup>7</sup>Merck & Co., Inc., Kenilworth, NJ, USA; <sup>8</sup>Pfizer Inc., Collegeville, PA, USA; <sup>9</sup>Pfizer Inc., Groton, CT, USA.

**Correspondence:** Samuel Dagogo-Jack, Division of Endocrinology, Diabetes & Metabolism, University of Tennessee Health Science Center, 920 Madison Avenue, Memphis, TN 38163; Tel.: 901-448-1246; E-mail: sdj@uthsc.edu; ORCID iD: 0000-0001-5318-9677

**Proposed running title:** Ertugliflozin Efficacy in T2DM and CKD Stage 3

**Journal:** *BMJ Open Diabetes Research & Care*

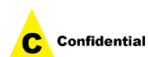

VERTIS CV Ertu Glycemic Efficacy and Safety in CKD3

Final Draft

**Supplementary Table 1** Baseline demographics and clinical characteristics of VERTIS CV patients with CKD Stage 3A and CKD Stage 3B\*

| Characteristic† | CKD Stage 3A |                    |                     | CKD Stage 3B |                    |                     |
|-----------------|--------------|--------------------|---------------------|--------------|--------------------|---------------------|
|                 | Placebo      | Ertugliflozin 5 mg | Ertugliflozin 15 mg | Placebo      | Ertugliflozin 5 mg | Ertugliflozin 15 mg |
|                 | (N=440)      | (N=466)            | (N=413)             | (N=158)      | (N=152)            | (N=147)             |
| Age — years     | 67.4 (7.6)   | 68.0 (7.5)         | 67.8 (7.3)          | 69.6 (6.9)   | 69.3 (8.1)         | 69.0 (8.1)          |
| Male — n (%)    | 295 (67.0)   | 303 (65.0)         | 261 (63.2)          | 100 (63.3)   | 93 (61.2)          | 90 (61.2)           |
| Race — n (%)‡   |              |                    |                     |              |                    |                     |
| White           | 374 (85.0)   | 403 (86.5)         | 369 (89.3)          | 140 (88.6)   | 120 (78.9)         | 124 (84.4)          |
| Black           | 13 (3.0)     | 12 (2.6)           | 7 (1.7)             | 4 (2.5)      | 9 (5.9)            | 2 (1.4)             |
| Asian           | 34 (7.7)     | 38 (8.2)           | 24 (5.8)            | 9 (5.7)      | 17 (11.2)          | 11 (7.5)            |
| Other           | 19 (4.3)     | 13 (2.8)           | 13 (3.1)            | 5 (3.2)      | 6 (3.9)            | 10 (6.8)            |
| Region — n (%)  |              |                    |                     |              |                    |                     |
| North America   | 132 (30.0)   | 138 (29.6)         | 118 (28.6)          | 59 (37.3)    | 51 (33.6)          | 51 (34.7)           |
| South America   | 37 (8.4)     | 32 (6.9)           | 39 (9.4)            | 9 (5.7)      | 10 (6.6)           | 10 (6.8)            |
| Europe          | 204 (46.4)   | 230 (49.4)         | 201 (48.7)          | 67 (42.4)    | 60 (39.5)          | 61 (41.5)           |
| Asia            | 38 (8.6)     | 34 (7.3)           | 23 (5.6)            | 8 (5.1)      | 15 (9.9)           | 9 (6.1)             |
| South Africa    | 21 (4.8)     | 24 (5.2)           | 21 (5.1)            | 7 (4.4)      | 13 (8.6)           | 9 (6.1)             |

## VERTIS CV Ertu Glycemic Efficacy and Safety in CKD3

Final Draft

|                                       |              |              |              |              |              |              |
|---------------------------------------|--------------|--------------|--------------|--------------|--------------|--------------|
| Australia/New Zealand                 | 8 (1.8)      | 8 (1.7)      | 11 (2.7)     | 8 (5.1)      | 3 (2.0)      | 7 (4.8)      |
| Body-mass index — kg/m <sup>2</sup>   | 32.4 (5.6)   | 32.4 (5.4)   | 32.7 (5.8)   | 33.0 (5.5)   | 32.0 (5.0)   | 31.8 (5.6)   |
| Duration of type 2 diabetes — years   | 15.9 (9.2)   | 15.1 (8.5)   | 14.8 (8.6)   | 17.8 (9.6)   | 16.0 (9.4)   | 16.3 (8.9)   |
| Glycated hemoglobin — %               | 8.2 (0.9)    | 8.2 (0.9)    | 8.2 (1.0)    | 8.2 (0.9)    | 8.3 (1.1)    | 8.3 (0.9)    |
| eGFR — mL/min/1.73 m <sup>2</sup> §   | 52.7 (4.5)   | 53.0 (4.2)   | 53.3 (4.2)   | 38.9 (3.9)   | 39.0 (4.1)   | 38.4 (4.1)   |
| Albuminuria — n (%)                   |              |              |              |              |              |              |
| Normal-albuminuria (<30 mg/g)         | 225 (51.1)   | 239 (51.3)   | 216 (52.3)   | 60 (38.0)    | 63 (41.4)    | 52 (35.4)    |
| Micro-albuminuria (≥30 to ≤300 mg/g)  | 143 (32.5)   | 158 (33.9)   | 118 (28.6)   | 64 (40.5)    | 51 (33.6)    | 60 (40.8)    |
| Macro-albuminuria (>300 mg/g)         | 59 (13.4)    | 57 (12.2)    | 62 (15.0)    | 33 (20.9)    | 34 (22.4)    | 33 (22.4)    |
| Unknown                               | 13 (3.0)     | 12 (2.6)     | 17 (4.1)     | 1 (0.6)      | 4 (2.6)      | 2 (1.4)      |
| Systolic blood pressure — mm Hg       | 132.2 (15.0) | 134.1 (15.0) | 133.4 (13.9) | 134.1 (15.7) | 136.6 (14.3) | 134.2 (16.1) |
| Hypertension — n (%)                  | 420 (95.5)   | 443 (95.1)   | 381 (92.3)   | 151 (95.6)   | 146 (96.1)   | 143 (97.3)   |
| Dyslipidemia — n (%)                  | 352 (80.0)   | 368 (79.0)   | 326 (78.9)   | 137 (86.7)   | 128 (84.2)   | 119 (81.0)   |
| Coronary artery disease — n (%)       | 351 (79.8)   | 366 (78.5)   | 317 (76.8)   | 129 (81.6)   | 125 (82.2)   | 119 (81.0)   |
| Cerebrovascular disease — n (%)       | 105 (23.9)   | 116 (24.9)   | 110 (26.6)   | 33 (20.9)    | 37 (24.3)    | 37 (25.2)    |
| Peripheral arterial disease — n (%)   | 83 (18.9)    | 78 (16.7)    | 78 (18.9)    | 40 (25.3)    | 35 (23.0)    | 33 (22.4)    |
| Antihyperglycemic medications — n (%) |              |              |              |              |              |              |

## VERTIS CV Ertu Glycemic Efficacy and Safety in CKD3

Final Draft

|                                          |            |            |            |            |            |           |
|------------------------------------------|------------|------------|------------|------------|------------|-----------|
| None                                     | 3 (0.7)    | 4 (0.9)    | 0 (0.0)    | 0 (0.0)    | 1 (0.7)    | 0 (0.0)   |
| Metformin                                | 314 (71.4) | 319 (68.5) | 276 (66.8) | 68 (43.0)  | 66 (43.4)  | 72 (49.0) |
| Insulin                                  | 245 (55.7) | 262 (56.2) | 215 (52.1) | 112 (70.9) | 108 (71.1) | 93 (63.3) |
| Sulfonylurea                             | 174 (39.5) | 186 (39.9) | 169 (40.9) | 53 (33.5)  | 45 (29.6)  | 50 (34.0) |
| Dipeptidyl peptidase-4 inhibitor         | 58 (13.2)  | 53 (11.4)  | 47 (11.4)  | 14 (8.9)   | 21 (13.8)  | 23 (15.6) |
| Glucagon-like peptide-1 receptor agonist | 18 (4.1)   | 18 (3.9)   | 14 (3.4)   | 7 (4.4)    | 7 (4.6)    | 5 (3.4)   |

---

\*CKD stage was based on eGFR calculated using the MDRD equation.

†Values are mean ± standard deviation unless otherwise stated.

‡Race was reported by the participant.

§eGFR was calculated using the MDRD equation.

Abbreviations: CKD, chronic kidney disease; CKD Stage 3A, eGFR 45 to <60 mL/min/1.73 m<sup>2</sup>; CKD Stage 3B, eGFR 30 to <45 mL/min/1.73 m<sup>2</sup>; eGFR, estimated glomerular filtration rate; MDRD, Modification of Diet in Renal Disease.

## VERTIS CV Ertu Glycemic Efficacy and Safety in CKD3

Final Draft

**Supplementary Table 2** Other efficacy outcomes at Week 18 in VERTIS CV patients with CKD Stage 3A and CKD Stage 3B\*

| Efficacy Outcome                            | CKD Stage 3A            |                         |                         | CKD Stage 3B            |                         |                         |
|---------------------------------------------|-------------------------|-------------------------|-------------------------|-------------------------|-------------------------|-------------------------|
|                                             | Placebo                 | Ertugliflozin 5 mg      | Ertugliflozin 15 mg     | Placebo                 | Ertugliflozin 5 mg      | Ertugliflozin 15 mg     |
| <b>FPG</b>                                  |                         |                         |                         |                         |                         |                         |
| n/N†                                        | 436/439                 | 464/465                 | 411/413                 | 158/158                 | 152/152                 | 146/146                 |
| Baseline mean (SD) — mg/dL                  | 174.7 (54.29)           | 174.25 (52.83)          | 176.4 (60.49)           | 165.75 (48.62)          | 178.2 (62.375)          | 163.7 (51.64)           |
| LS-mean change from baseline (95% CI)‡      | -22.18 (-26.54, -17.81) | -30.53 (-34.69, -26.38) | -33.52 (-37.80, -29.25) | -25.11 (-32.58, -17.64) | -30.88 (-38.08, -23.68) | -27.46 (-34.86, -20.05) |
| Difference in LS mean vs. placebo (95% CI)‡ | —                       | -8.36 (-13.43, -3.29)   | -11.35 (-16.52, -6.18)  | —                       | -5.77 (-14.52, 2.98)    | -2.35 (-11.28, 6.58)    |
| P-value vs. placebo§                        | —                       | 0.001                   | <0.001                  | —                       | 0.195                   | 0.605                   |
| <b>Body Weight</b>                          |                         |                         |                         |                         |                         |                         |
| n/N†                                        | 439/439                 | 465/465                 | 413/413                 | 158/158                 | 152/152                 | 147/147                 |
| Baseline mean (SD) — kg                     | 92.3 (19.12)            | 92.1 (18.03)            | 92.5 (19.36)            | 93.1 (18.85)            | 90.0 (17.22)            | 89.1 (19.14)            |
| LS-mean change from baseline (95% CI)‡      | -0.52 (-0.80, -0.25)    | -1.84 (-2.11, -1.58)    | -1.90 (-2.18, -1.62)    | -0.08 (-0.55, 0.40)     | -1.59 (-2.06, -1.12)    | -2.03 (-2.51, -1.55)    |
| Difference in LS mean vs. placebo (95% CI)‡ | —                       | -1.32 (-1.70, -0.94)    | -1.38 (-1.77, -0.99)    | —                       | -1.51 (-2.18, -0.84)    | -1.95 (-2.63, -1.28)    |
| P-value vs. placebo§                        | —                       | <0.001                  | <0.001                  | —                       | <0.001                  | <0.001                  |
| <b>SBP</b>                                  |                         |                         |                         |                         |                         |                         |
| n/N†                                        | 439/439                 | 464/465                 | 413/413                 | 158/158                 | 151/152                 | 147/147                 |
| Baseline mean (SD) — mm Hg                  | 132.2 (15.00)           | 134.1 (15.00)           | 133.4 (13.86)           | 134.1 (15.65)           | 136.6 (14.26)           | 134.2 (16.08)           |
| LS-mean change from baseline (95% CI)‡      | 0.99 (-0.37, 2.35)      | -2.03 (-3.35, -0.71)    | -2.42 (-3.80, -1.04)    | 0.59 (-1.89, 3.06)      | -1.93 (-4.38, 0.52)     | -1.83 (-4.36, 0.69)     |
| Difference in LS mean vs. placebo (95% CI)‡ | —                       | -3.02 (-4.83, -1.21)    | -3.41 (-5.26, -1.55)    | —                       | -2.52 (-5.86, 0.82)     | -2.42 (-5.81, 0.97)     |
| P-value vs. placebo§                        | —                       | 0.001                   | <0.001                  | —                       | 0.139                   | 0.162                   |

## VERTIS CV Ertu Glycemic Efficacy and Safety in CKD3

Final Draft

\*CKD stage was based on eGFR calculated using the MDRD equation.

†n is the number of patients with non-missing assessments at baseline; N is the number of patients in the cLDA FAS (i.e., randomized patients who took at least 1 dose of study medication and had at least 1 assessment at or after baseline).

‡Calculated using a cLDA model with fixed effects for treatment, time, baseline eGFR (continuous) and the interaction of time (categorical) by treatment.

§Nominal P-values.

Abbreviations: CI, confidence interval; CKD, chronic kidney disease; CKD Stage 3A, eGFR 45 to <60 mL/min/1.73 m<sup>2</sup>; CKD Stage 3B, eGFR 30 to <45 mL/min/1.73 m<sup>2</sup>; cLDA, constrained longitudinal data analysis; eGFR, estimated glomerular filtration rate; FAS, full analysis set; FPG, fasting plasma glucose; LS, least squares; MDRD, Modification of Diet in Renal Disease; SBP, systolic blood pressure; SD, standard deviation.

VERTIS CV Ertu Glycemic Efficacy and Safety in CKD3

Final Draft

**Supplementary Table 3** Adverse events in VERTIS CV patients with CKD Stage 3A and CKD Stage 3B\*

| Adverse Event†                                       | CKD Stage 3A |                    |                     | CKD Stage 3B |                    |                     |
|------------------------------------------------------|--------------|--------------------|---------------------|--------------|--------------------|---------------------|
|                                                      | Placebo      | Ertugliflozin 5 mg | Ertugliflozin 15 mg | Placebo      | Ertugliflozin 5 mg | Ertugliflozin 15 mg |
|                                                      | (N=439)‡     | (N=465)‡           | (N=413)‡            | (N=158)‡     | (N=152)‡           | (N=147)‡            |
| Any AE — n (%)                                       | 394 (89.7)   | 422 (90.8)         | 372 (90.1)          | 141 (89.2)   | 139 (91.4)         | 129 (87.8)          |
| Serious AEs — n (%)                                  | 180 (41.0)   | 191 (41.1)         | 151 (36.6)          | 70 (44.3)    | 61 (40.1)          | 71 (48.3)           |
| AEs leading to discontinuation of study drug — n (%) | 29 (6.6)     | 51 (11.0)          | 34 (8.2)            | 22 (13.9)    | 15 (9.9)           | 20 (13.6)           |
| Deaths — n (%)                                       | 17 (3.9)     | 26 (5.6)           | 18 (4.4)            | 11 (7.0)     | 8 (5.3)            | 12 (8.2)            |
| Pre-specified AEs of interest — n (%)                |              |                    |                     |              |                    |                     |
| Urinary tract infection                              | 58 (13.2)    | 70 (15.1)          | 56 (13.6)           | 19 (12.0)    | 15 (9.9)           | 23 (15.6)           |
| Genital mycotic infection — women§                   | 5 (3.4)      | 8 (4.9)            | 11 (7.2)            | 3 (5.2)      | 1 (1.7)            | 6 (10.5)            |
| Genital mycotic infection — men¶                     | 1 (0.3)      | 10 (3.3)           | 12 (4.6)            | 0 (0.0)      | 2 (2.2)            | 1 (1.1)             |
| Symptomatic hypoglycemia                             | 161 (36.7)   | 172 (37.0)         | 144 (34.9)          | 63 (39.9)    | 60 (39.5)          | 49 (33.3)           |
| Hypovolemia                                          | 27 (6.2)     | 35 (7.5)           | 18 (4.4)            | 12 (7.6)     | 9 (5.9)            | 15 (10.2)           |
| Kidney-related AEs — n (%)                           |              |                    |                     |              |                    |                     |
| Any kidney-related AE                                | 36 (8.2)     | 41 (8.8)           | 33 (8.0)            | 25 (15.8)    | 19 (12.5)          | 23 (15.6)           |
| Acute kidney injury                                  | 20 (4.6)     | 16 (3.4)           | 16 (3.9)            | 12 (7.6)     | 7 (4.6)            | 14 (9.5)            |
| Kidney failure                                       | 11 (2.5)     | 4 (0.9)            | 8 (1.9)             | 6 (3.8)      | 10 (6.6)           | 3 (2.0)             |
| Kidney impairment                                    | 11 (2.5)     | 22 (4.7)           | 11 (2.7)            | 7 (4.4)      | 6 (3.9)            | 6 (4.1)             |

## VERTIS CV Ertu Glycemic Efficacy and Safety in CKD3

Final Draft

| Adjudicated kidney events — n (%) |          |          |          |          |          |          |
|-----------------------------------|----------|----------|----------|----------|----------|----------|
| Any adjudicated kidney event      | 13       | 7        | 14       | 11       | 9        | 7        |
| Causality                         |          |          |          |          |          |          |
| Very likely                       | 0 (0.0)  | 0 (0.0)  | 0 (0.0)  | 0 (0.0)  | 0 (0.0)  | 0 (0.0)  |
| Probable                          | 0 (0.0)  | 0 (0.0)  | 0 (0.0)  | 0 (0.0)  | 0 (0.0)  | 0 (0.0)  |
| Possible                          | 3 (23.1) | 0 (0.0)  | 2 (14.3) | 1 (9.1)  | 0 (0.0)  | 1 (14.3) |
| Doubtful                          | 5 (38.5) | 4 (57.1) | 6 (42.9) | 2 (18.2) | 6 (66.7) | 2 (28.6) |
| Not related                       | 5 (38.5) | 3 (42.9) | 6 (42.9) | 8 (72.7) | 3 (33.3) | 4 (57.1) |

\*CKD stage was based on eGFR calculated using the MDRD equation.

†All events occurring within 14 days of final dose of treatment and including events after initiation of glycemic rescue medication, except for those related to hypoglycemia.

‡N is the number of patients in the safety analysis population (i.e., patients who took at least 1 dose of study medication).

§Number of women with CKD Stage 3A: placebo, n=145; ertugliflozin 5 mg, n=163; ertugliflozin 15 mg, n=152. Number of women with CKD Stage 3B: placebo, n=58; ertugliflozin 5 mg, n=59; ertugliflozin 15 mg, n=57.

¶Number of men with CKD Stage 3A: placebo, n=294; ertugliflozin 5 mg, n=302; ertugliflozin 15 mg, n=261. Number of men with CKD Stage 3B: placebo, n=100; ertugliflozin 5 mg, n=93; ertugliflozin 15 mg, n=90.

|| Symptomatic hypoglycemia was defined as an event with clinical symptoms reported by the investigator as hypoglycemia (biochemical documentation not required).

Abbreviations: AE, adverse event; CKD, chronic kidney disease; CKD Stage 3A, eGFR 45 to <60 mL/min/1.73 m<sup>2</sup>; CKD Stage 3B, eGFR 30 to <45 mL/min/1.73 m<sup>2</sup>; eGFR, estimated glomerular filtration rate; MDRD, Modification of Diet in Renal Disease.
